# Supplementary material for: The Candida albicans ENO1 gene encodes a transglutaminase involved in growth, cell division, morphogenesis, and osmotic protection
Source: PubMed Central journal article supplement (PMC5868267; doi:10.1074/jbc.m117.810440), 2018-01-31
Supplement: 10.1074_M117.810440_jbc.M117.810440-1.pdf [file 10.1074_M117.810440_jbc.M117.810440-1.pdf]

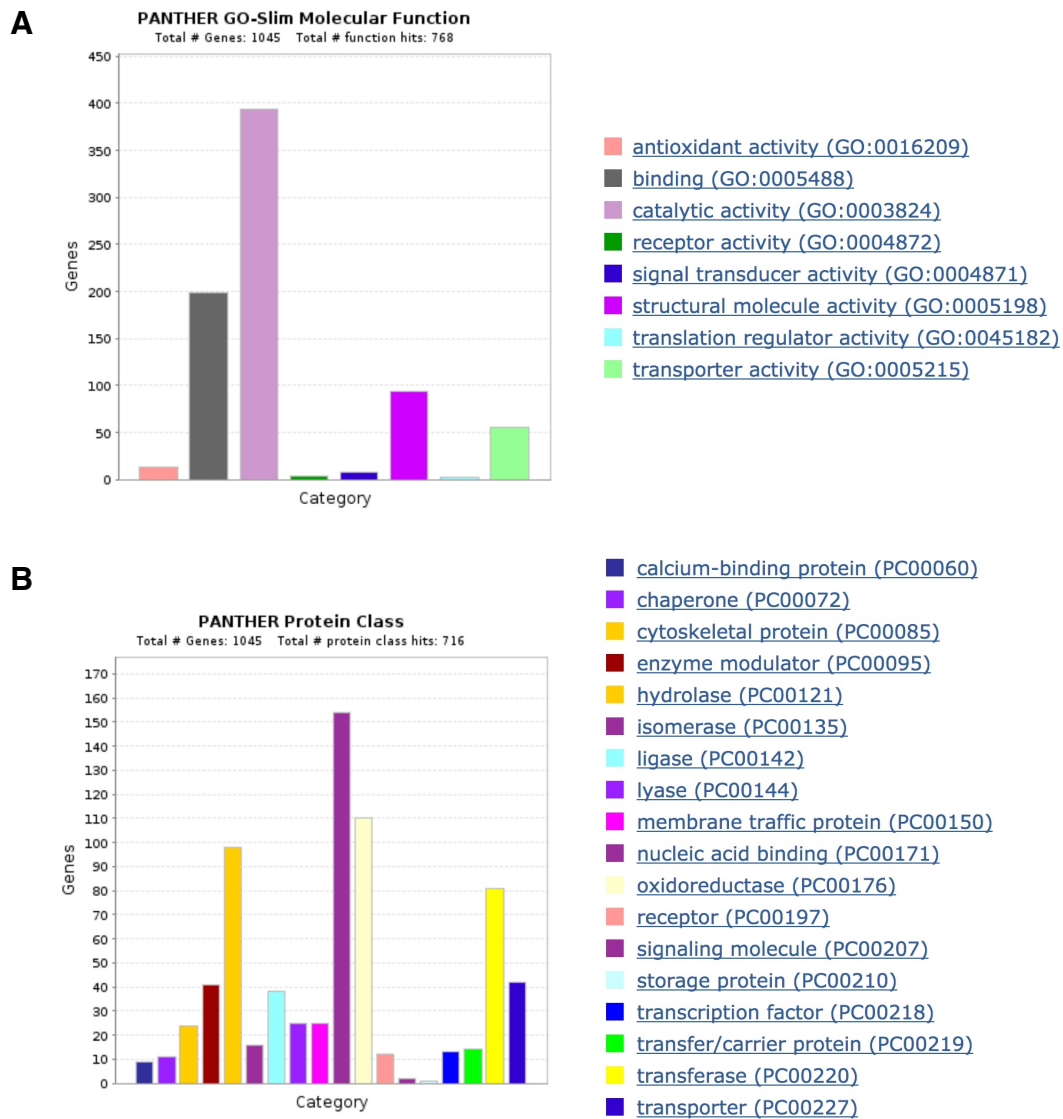

**Figure S1.** Classification of proteins extracted with 2% SDS in the Gene Ontology Panther Classification System. All proteins (1046) were categorized according to their Molecular Function (A) and Protein Class (B).
