# Supplementary material for: The Candida albicans ENO1 gene encodes a transglutaminase involved in growth, cell division, morphogenesis, and osmotic protection
Source: PubMed Central journal article supplement (PMC5868267; doi:10.1074/jbc.m117.810440), 2018-01-31
Supplement: 10.1074_M117.810440_jbc.M117.810440-4.pdf [file 10.1074_M117.810440_jbc.M117.810440-4.pdf]

|        |     |                                       |                                   |
|--------|-----|---------------------------------------|-----------------------------------|
| HsLC3  | 1   | MPSDRPFKORRSFADRCKEVOOIRDOHPS         | KIPVIERYKGEKOLPVLDTKFLVDPDVNM     |
| CaAtg8 | 1   | --MRSQFKDEHPFEKROAEAARIAQRFKD         | RVPVICEKVE-NSDIPEIDKRKYLVPVDLTV   |
| ScAtg8 | 1   | --MKSTFKSEYPPFEKKAESERADRFKN          | RIPVICEKAE-KSDIPEIDKRKYLVPADLTV   |
|        |     |                                       |                                   |
| HsLC3  | 61  | SELVKIIRRRLOLNPTQAFLLVNOHSMVSVSTPIADI | IYEQEKDEDGFLYMVYASQETFG           |
| CaAtg8 | 58  | GQFVYVIRKRKLPSEKAIFIFVNDIL            | -PPTAALISTIYEEHKDEDGFLYVLYSGENTFG |
| ScAtg8 | 58  | GQFVYVIRKRIMLPPEKAIFIFVNDTL           | -PPTAALMSAIYQEHKDKDGFLYVLYSGENTFG |
|        |     |                                       |                                   |
| HsLC3  | 121 | F-----                                |                                   |
| CaAtg8 | 117 | EKLAI DISSLD FSDIPDYV                 |                                   |
| ScAtg8 | 117 | R-----                                |                                   |

**Figure S4.** Amino acid sequence alignment of the Atg8 autophagy marker from *C. albicans*, *S. cerevisiae* and *H. sapiens* revealed a conserved epitope recognized by anti-Atg8 rabbit polyclonal antibody (rectangle).
