# Supplementary material for: The Candida albicans ENO1 gene encodes a transglutaminase involved in growth, cell division, morphogenesis, and osmotic protection
Source: PubMed Central journal article supplement (PMC5868267; doi:10.1074/jbc.m117.810440), 2018-01-31
Supplement: 10.1074_M117.810440_jbc.M117.810440-5.pdf [file 10.1074_M117.810440_jbc.M117.810440-5.pdf]

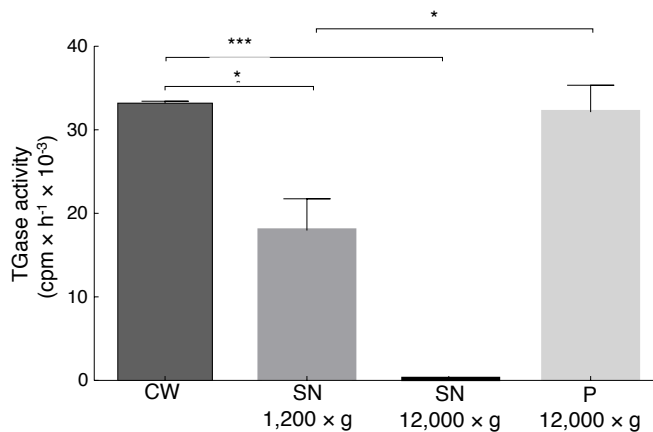

**Figure S6. Determination of cell wall TGase activity of *Candida albicans* digested with zymolyase and chitinase and subjected to solubilization with 8 M urea.** Cell walls of *Candida albicans* were digested with zymolyase and chitinase, denatured with 8 M urea, renatured by dialysis, centrifuged to obtain different fractions, and determined TGase activity in each of them as described in Experimental Procedures. CW, cell walls; SN, supernatant; P, pellet.
