# Supplementary material for: The Candida albicans ENO1 gene encodes a transglutaminase involved in growth, cell division, morphogenesis, and osmotic protection
Source: PubMed Central journal article supplement (PMC5868267; doi:10.1074/jbc.m117.810440), 2018-01-31
Supplement: 10.1074_M117.810440_jbc.M117.810440-9.pdf [file 10.1074_M117.810440_jbc.M117.810440-9.pdf]

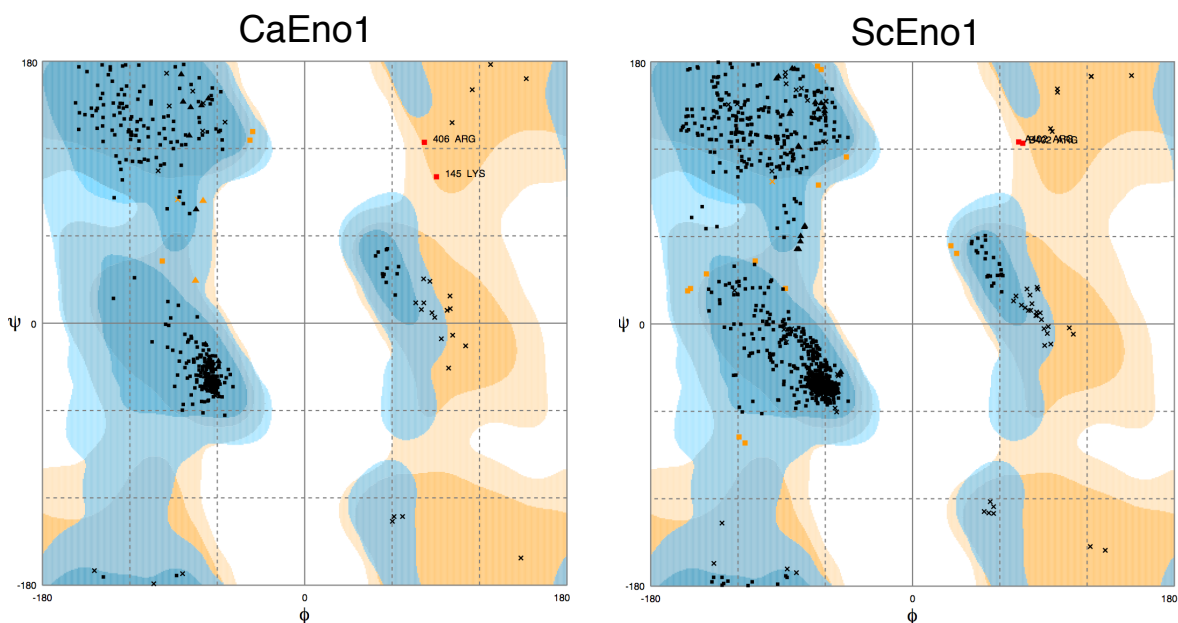

**Figure S11.** Ramachandran plots of *C. albicans* and *S. cerevisiae* enolase 1 structures. The CaEno1 protein structure has 99.6% of all residues in favored (98.2%) and allowed (1.4%) regions. The ScEno1 (PDB ID 2al1) protein structure has 99.7% of all modeled residues in favored (98.1%) and allowed (1.6%) regions.
