# Supplementary material for: The Candida albicans ENO1 gene encodes a transglutaminase involved in growth, cell division, morphogenesis, and osmotic protection
Source: PubMed Central journal article supplement (PMC5868267; doi:10.1074/jbc.m117.810440), 2018-01-31
Supplement: 10.1074_M117.810440_jbc.M117.810440-10.pdf [file 10.1074_M117.810440_jbc.M117.810440-10.pdf]

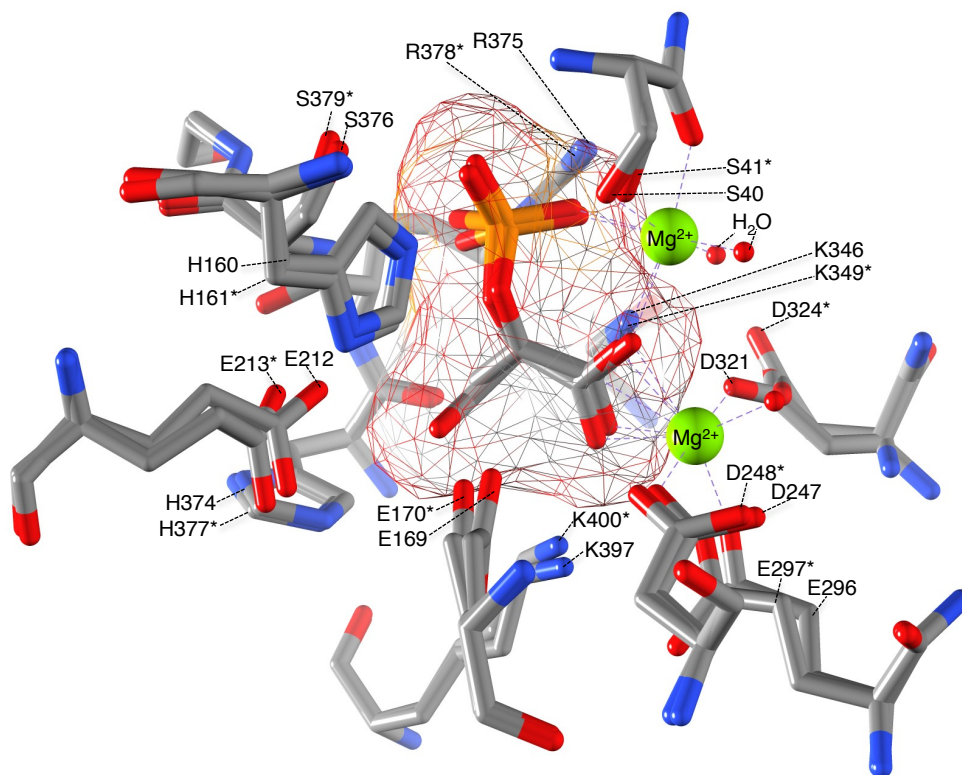

**Figure S12.** Structural comparison of catalytic sites of CaEno1 and ScEno1 polypeptides bound to phosphoenolpyruvate/2-phosphoglycerate. Surface of substrate/product is represented by a mesh. Asterisks, residues corresponding to *C. albicans* enolase 1.
