# Supplementary material for: The Candida albicans ENO1 gene encodes a transglutaminase involved in growth, cell division, morphogenesis, and osmotic protection
Source: PubMed Central journal article supplement (PMC5868267; doi:10.1074/jbc.m117.810440), 2018-01-31
Supplement: 10.1074_M117.810440_jbc.M117.810440-11.pdf [file 10.1074_M117.810440_jbc.M117.810440-11.pdf]

CaEnol 1 -----  
AgTGase 1 -----  
MmTGase 1 -----  
GgTGase 1 -----  
AmTGase 1 -----M<sup>F</sup>V-RFYD  
HsTGase 1 MMDGPRSDVGRWGGNPLQPPTTPSPEPEPEPDGRSRRGGGRS<sup>F</sup>WARCCGCCSCRNAADDD  
HsFactorXII 1 -----

CaEnol 1 -----  
AgTGase 1 ---MSTTSTNYRIWPARK-----VVTNSAIKD<sup>V</sup>LKIE  
MmTGase 1 -----MAEELLL-----E  
GgTGase 1 -----MG--GPGPDGTMAEELVL-----E  
AmTGase 8 -----RYRI<sup>F</sup>NDRRFRP-----FFFAFYWEDFTV<sup>F</sup>VTIL  
HsTGase 61 WGF<sup>F</sup>PSDS<sup>S</sup>RGRGSS<sup>S</sup>CTRR--PGRGSDSRRE<sup>F</sup>VSRGSGVNAAGDGTIREGMLV-VNGVD  
HsFactorXII 1 --SE---TSRTAF<sup>G</sup>CRRAV<sup>P</sup>PNN<sup>S</sup>NA<sup>A</sup>EDDLE<sup>F</sup>TVELOGV--V<sup>R</sup>RGVNLOEFLN-VTSVH

CaEnol 1 -----MSYATKIHARYVYDS<sup>R</sup>SGNPTVEVDF<sup>T</sup>  
AgTGase 30 SIND<sup>F</sup>CFDENGK<sup>F</sup>THTSHY<sup>E</sup>AMTKPRPTKR<sup>R</sup>Q<sup>L</sup>LIVRRGAP<sup>F</sup>FEVRL<sup>L</sup>T-NRR<sup>F</sup>DP-----T  
MmTGase 9 RCDLE<sup>I</sup>QANGRD<sup>H</sup>H<sup>T</sup>ADL-----COEKL<sup>L</sup>VRRGQ<sup>R</sup>FR<sup>L</sup>TLY<sup>F</sup>FEGRGY<sup>Q</sup>A-----S  
GgTGase 18 TCDL<sup>Q</sup>CERNGRE<sup>H</sup>RTE<sup>E</sup>M-----GSQ<sup>L</sup>LIVRRGQ<sup>F</sup>PT<sup>T</sup>ILN<sup>F</sup>AGRGY<sup>E</sup>E-----G  
AmTGase 38 HVD<sup>P</sup>CI<sup>G</sup>ENGAK<sup>H</sup>RTSR<sup>E</sup>Y<sup>E</sup>AMSRNG--DGSRL<sup>V</sup>VRRGQ<sup>E</sup>FYL<sup>H</sup>LAL-SRD<sup>Y</sup>DP-----D  
HsTGase 117 LLSSRS<sup>D</sup>ONRR<sup>R</sup>EH<sup>H</sup>TD<sup>E</sup>Y--EYDEL<sup>I</sup>VRRGQ<sup>F</sup>HML<sup>L</sup>LL-SRT<sup>Y</sup>ES-----S  
HsFactorXII 52 L<sup>F</sup>KERWD<sup>T</sup>NKVD<sup>H</sup>HT<sup>D</sup>KY--EN<sup>N</sup>KLIVRRGQ<sup>S</sup>FY<sup>V</sup>QID<sup>F</sup>-SR<sup>P</sup>YD<sup>F</sup>-----R

CaEnol 27 TDKGLFRSIVP<sup>S</sup>G-A---STGV<sup>H</sup>EAL--EIR-----DGD<sup>K</sup>SKW<sup>L</sup>GKGV<sup>L</sup>K-----  
AgTGase 84 VDTMVLV<sup>S</sup>IV<sup>S</sup>Y<sup>G</sup>SEK<sup>P</sup>CFGNGT<sup>E</sup>TYV<sup>L</sup>VSVATDGTAPAE<sup>P</sup>DELAED<sup>W</sup>RAV<sup>V</sup>DS<sup>K</sup>DK<sup>E</sup>  
MmTGase 54 VDSL<sup>T</sup>FGAVT--G--PDP<sup>S</sup>EAGTKARF--SLSD<sup>N</sup>-----V--E<sup>G</sup>SW<sup>S</sup>ASV<sup>L</sup>DOOD<sup>N</sup>  
GgTGase 63 VDKLAFD<sup>V</sup>ET--G--PCP<sup>V</sup>ETS<sup>G</sup>TRSHF--TLTD<sup>C</sup>-----P--E<sup>E</sup>GT<sup>W</sup>SAV<sup>L</sup>QO<sup>D</sup>GA--  
AmTGase 89 TDGISLV<sup>F</sup>TV--DGA<sup>R</sup>POY<sup>G</sup>HGT<sup>L</sup>VAT--FVLY<sup>P</sup>-----GQR<sup>S</sup>EAS<sup>W</sup>QAY<sup>I</sup>DSL<sup>H</sup>SN--  
HsTGase 161 NNLN<sup>L</sup>RVHT<sup>S</sup>PN<sup>A</sup>IK<sup>G</sup>FQ<sup>F</sup>TVR<sup>T</sup>QSDAGE<sup>F</sup>OLP<sup>F</sup>DP<sup>R</sup>NEI<sup>Y</sup>IL<sup>F</sup>NPW<sup>C</sup>PE<sup>D</sup>I<sup>V</sup>Y<sup>V</sup>D  
HsFactorXII 96 RDLFRVEY<sup>V</sup>I--G--RY<sup>P</sup>OEN<sup>K</sup>G<sup>T</sup>YIP<sup>V</sup>--PIV<sup>S</sup>E-----LQ--SG<sup>K</sup>W<sup>G</sup>AK<sup>I</sup>V<sup>M</sup>RE<sup>D</sup>R--

CaEnol 66 -----AVANVN-----DIIAPALIKAKID<sup>V</sup>V  
AgTGase 144 KGV<sup>E</sup>L<sup>T</sup>LO<sup>I</sup>MI<sup>P</sup>SYTPV<sup>W</sup>RSI<sup>Q</sup>FH<sup>R</sup>LD<sup>T</sup>DA<sup>K</sup>SMTEI<sup>K</sup>EPL<sup>F</sup>V<sup>L</sup>FN<sup>P</sup>W<sup>C</sup>K<sup>N</sup>DA<sup>V</sup>Y<sup>M</sup>E  
MmTGase 99 -----VLSL<sup>Q</sup>LCT<sup>P</sup>AN<sup>A</sup>PI<sup>G</sup>LY<sup>R</sup>LSLE<sup>A</sup>ST<sup>G</sup>Y<sup>Q</sup>---GSS<sup>F</sup>VL<sup>G</sup>H<sup>F</sup>IL<sup>L</sup>YN<sup>A</sup>W<sup>C</sup>P<sup>A</sup>DD<sup>V</sup>Y<sup>L</sup>D  
GgTGase 108 -----TLCV<sup>S</sup>LC<sup>S</sup>PS<sup>T</sup>AR<sup>V</sup>GR<sup>Y</sup>RL<sup>T</sup>LE<sup>A</sup>ST<sup>G</sup>Y<sup>Q</sup>---GSS<sup>F</sup>HL<sup>G</sup>D<sup>F</sup>V<sup>L</sup>L<sup>F</sup>NA<sup>W</sup>H<sup>P</sup>ED<sup>A</sup>V<sup>Y</sup>L<sup>K</sup>  
AmTGase 138 -----FL<sup>R</sup>LK<sup>I</sup>V<sup>P</sup>AP<sup>D</sup>A<sup>I</sup>IK<sup>W</sup>R<sup>M</sup>D<sup>I</sup>D<sup>T</sup>KN<sup>K</sup>ST<sup>D</sup>GAV<sup>S</sup>F<sup>T</sup>M<sup>K</sup>HP<sup>F</sup>Y<sup>L</sup>V<sup>F</sup>N<sup>P</sup>W<sup>C</sup>K<sup>E</sup>DA<sup>V</sup>Y<sup>M</sup>E  
HsTGase 204 -----NLN<sup>L</sup>RVHT<sup>S</sup>PN<sup>A</sup>IK<sup>G</sup>FQ<sup>F</sup>TVR<sup>T</sup>QSDAGE<sup>F</sup>OLP<sup>F</sup>DP<sup>R</sup>NEI<sup>Y</sup>IL<sup>F</sup>NPW<sup>C</sup>PE<sup>D</sup>I<sup>V</sup>Y<sup>V</sup>D  
HsFactorXII 141 -----SV<sup>R</sup>LS<sup>I</sup>Q<sup>S</sup>PK<sup>C</sup>I<sup>V</sup>G<sup>K</sup>F<sup>R</sup>MY<sup>V</sup>AV<sup>W</sup>TV<sup>P</sup>Y<sup>G</sup>VL<sup>R</sup>TS<sup>R</sup>NP<sup>E</sup>T<sup>D</sup>TY<sup>L</sup>FN<sup>P</sup>W<sup>C</sup>ED<sup>D</sup>AV<sup>Y</sup>L<sup>D</sup>

CaEnol 87 DQAKID<sup>E</sup>FL<sup>L</sup>SLD<sup>C</sup>T<sup>P</sup>N<sup>K</sup>SK<sup>L</sup>G-----ANAIL<sup>G</sup>VS<sup>T</sup>-----AA<sup>N</sup>AAA  
AgTGase 204 DEAW<sup>R</sup>SEY<sup>I</sup>LDD<sup>S</sup>TAT<sup>C</sup>K<sup>P</sup>ASK<sup>L</sup>H<sup>M</sup>SS<sup>W</sup>FL<sup>G</sup>Q<sup>F</sup>EAN<sup>V</sup>LD<sup>S</sup>AL<sup>Y</sup>IVE<sup>O</sup>V-----AN<sup>V</sup>KA  
MmTGase 152 SEER<sup>R</sup>EY<sup>V</sup>L<sup>T</sup>QO<sup>G</sup>FI<sup>Y</sup>QGS<sup>V</sup>PK<sup>F</sup>IK<sup>S</sup>V<sup>P</sup>WN<sup>F</sup>Q<sup>F</sup>OD<sup>G</sup>ILD<sup>T</sup>C<sup>L</sup>ML<sup>L</sup>DM<sup>N</sup>PK<sup>F</sup>L<sup>K</sup>NR<sup>S</sup>RD<sup>C</sup>  
GgTGase 161 EDER<sup>R</sup>EY<sup>V</sup>LS<sup>Q</sup>GLI<sup>Y</sup>M<sup>G</sup>SR<sup>D</sup>Y<sup>I</sup>TS<sup>T</sup>P<sup>W</sup>N<sup>F</sup>Q<sup>F</sup>EDE<sup>I</sup>L<sup>A</sup>IC<sup>E</sup>ML<sup>D</sup>IN<sup>P</sup>K<sup>F</sup>LR<sup>D</sup>Q<sup>N</sup>LD<sup>C</sup>  
AmTGase 194 GED<sup>R</sup>O<sup>E</sup>Y<sup>V</sup>MAED<sup>G</sup>L<sup>I</sup>WR<sup>G</sup>SY<sup>N</sup>RR<sup>R</sup>TV<sup>W</sup>K<sup>Y</sup>S<sup>O</sup>F<sup>E</sup>R<sup>D</sup>ILD<sup>C</sup>AL<sup>H</sup>MI<sup>E</sup>V-----G<sup>K</sup>RV<sup>V</sup>  
HsTGase 260 HED<sup>W</sup>R<sup>O</sup>EY<sup>V</sup>LN<sup>E</sup>S<sup>R</sup>I<sup>Y</sup>Y<sup>G</sup>TEA<sup>Q</sup>I<sup>G</sup>ERT<sup>W</sup>NY<sup>G</sup>Q<sup>F</sup>D<sup>H</sup>GV<sup>L</sup>DA<sup>C</sup>L<sup>Y</sup>IL<sup>D</sup>R-----R<sup>G</sup>MP<sup>Y</sup>  
HsFactorXII 197 NE<sup>K</sup>ER<sup>E</sup>EY<sup>V</sup>LN<sup>D</sup>I<sup>G</sup>V<sup>F</sup>Y<sup>G</sup>E<sup>V</sup>ND<sup>I</sup>K<sup>T</sup>RS<sup>W</sup>SY<sup>G</sup>Q<sup>F</sup>ED<sup>G</sup>ILD<sup>T</sup>C<sup>L</sup>Y<sup>V</sup>MD<sup>R</sup>-----AQ<sup>M</sup>DL

CaEnol 125 AAQGI<sup>P</sup>LY<sup>K</sup>--HIAN<sup>I</sup>SN<sup>A</sup>KK--GK<sup>F</sup>V<sup>L</sup>P<sup>V</sup>F<sup>F</sup>Q<sup>N</sup>V<sup>L</sup>NGG<sup>S</sup>HA---GGAL<sup>A</sup>F<sup>O</sup>E<sup>F</sup>M-----  
AgTGase 258 PIS<sup>G</sup>NP<sup>V</sup>L<sup>V</sup>IRAL<sup>S</sup>GAL<sup>N</sup>TAD--GT<sup>V</sup>L<sup>Q</sup>GN<sup>W</sup>SN<sup>N</sup>VE<sup>G</sup>GT<sup>A</sup>PT<sup>S</sup>WT<sup>G</sup>SA<sup>K</sup>I<sup>L</sup>O<sup>E</sup>F<sup>Y</sup>D<sup>T</sup>G--E  
MmTGase 212 SRR<sup>S</sup>SP<sup>I</sup>Y<sup>V</sup>GR<sup>V</sup>SD<sup>M</sup>V<sup>N</sup>CND--DQ<sup>G</sup>V<sup>L</sup>L<sup>G</sup>R<sup>W</sup>D<sup>N</sup>NY<sup>G</sup>D<sup>G</sup>I<sup>S</sup>PM<sup>A</sup>W<sup>I</sup>GS<sup>V</sup>D<sup>I</sup>L<sup>R</sup>WR<sup>K</sup>E<sup>H</sup>G<sup>C</sup>Q  
GgTGase 221 SRR<sup>N</sup>DP<sup>V</sup>Y<sup>I</sup>GR<sup>V</sup>SAM<sup>V</sup>NCN<sup>D</sup>ED<sup>H</sup>G<sup>V</sup>LL<sup>G</sup>R<sup>W</sup>D<sup>N</sup>H<sup>Y</sup>ED<sup>G</sup>MS<sup>P</sup>MA<sup>W</sup>I<sup>G</sup>SV<sup>D</sup>I<sup>L</sup>K<sup>R</sup>WR<sup>K</sup>LG<sup>C</sup>Q  
AmTGase 248 SAR<sup>H</sup>DP<sup>V</sup>I<sup>S</sup>RV<sup>L</sup>SA<sup>A</sup>V<sup>N</sup>SPD--DNG<sup>A</sup>LM<sup>G</sup>N<sup>W</sup>SN<sup>D</sup>FG<sup>G</sup>TP<sup>P</sup>R<sup>W</sup>L<sup>G</sup>S<sup>O</sup>K<sup>I</sup>L<sup>O</sup>Q<sup>Y</sup>K<sup>R</sup>--K  
HsTGase 313 GGR<sup>G</sup>DP<sup>V</sup>N<sup>V</sup>SR<sup>V</sup>ISAM<sup>V</sup>NSLD--DNG<sup>V</sup>L<sup>I</sup>GN<sup>W</sup>SG<sup>D</sup>YS<sup>R</sup>GT<sup>N</sup>PS<sup>A</sup>W<sup>V</sup>GS<sup>V</sup>E<sup>I</sup>LL<sup>S</sup>Y<sup>L</sup>RT<sup>G</sup>--Y  
HsFactorXII 250 S<sup>R</sup>G<sup>R</sup>N<sup>P</sup>I<sup>K</sup>V<sup>S</sup>R<sup>V</sup>G<sup>S</sup>AM<sup>V</sup>N<sup>A</sup>KD--DE<sup>G</sup>V<sup>L</sup>V<sup>G</sup>SW<sup>D</sup>N<sup>I</sup>Y<sup>A</sup>Y<sup>G</sup>V<sup>P</sup>PS<sup>A</sup>W<sup>T</sup>GS<sup>V</sup>D<sup>I</sup>L<sup>L</sup>EY<sup>R</sup>SS<sup>E</sup>--N

CaEnol 173 -----IAPT<sup>G</sup>VS<sup>T</sup>F<sup>S</sup>EAL<sup>R</sup>IG<sup>S</sup>E<sup>V</sup>Y<sup>H</sup>N<sup>L</sup>KS<sup>L</sup>T<sup>K</sup>K<sup>K</sup>Y<sup>G</sup>Q<sup>S</sup>AG<sup>N</sup>V<sup>G</sup>DE<sup>G</sup>GV<sup>A</sup>PD<sup>I</sup>K<sup>T</sup>PK  
AgTGase 316 RV<sup>K</sup>YG<sup>Q</sup>CW<sup>V</sup>Y<sup>A</sup>GL<sup>L</sup>TS<sup>V</sup>CR<sup>A</sup>IG<sup>I</sup>PS<sup>R</sup>I<sup>T</sup>NE<sup>S</sup>AG<sup>D</sup>H<sup>D</sup>AS<sup>L</sup>S-----  
MmTGase 271 QV<sup>K</sup>YG<sup>Q</sup>CW<sup>V</sup>F<sup>A</sup>AV<sup>A</sup>CT<sup>V</sup>L<sup>R</sup>CL<sup>G</sup>IP<sup>R</sup>V<sup>T</sup>N<sup>Y</sup>NS<sup>A</sup>HD<sup>Q</sup>NS<sup>N</sup>LL-----  
GgTGase 281 PV<sup>K</sup>YG<sup>Q</sup>CW<sup>V</sup>F<sup>A</sup>AV<sup>A</sup>CT<sup>V</sup>M<sup>R</sup>CL<sup>G</sup>V<sup>P</sup>S<sup>R</sup>V<sup>T</sup>N<sup>Y</sup>NS<sup>A</sup>HD<sup>T</sup>NG<sup>N</sup>L<sup>V</sup>-----  
AmTGase 306 PV<sup>K</sup>YG<sup>Q</sup>CW<sup>V</sup>F<sup>S</sup>GL<sup>A</sup>T<sup>I</sup>CR<sup>A</sup>L<sup>G</sup>LP<sup>C</sup>R<sup>V</sup>V<sup>T</sup>N<sup>Y</sup>NS<sup>A</sup>HD<sup>T</sup>O<sup>S</sup>SL<sup>T</sup>-----  
HsTGase 371 SV<sup>P</sup>Y<sup>G</sup>Q<sup>C</sup>W<sup>V</sup>F<sup>A</sup>GV<sup>T</sup>TV<sup>L</sup>R<sup>C</sup>L<sup>G</sup>L<sup>A</sup>TR<sup>V</sup>T<sup>N</sup>Y<sup>F</sup>NS<sup>A</sup>HD<sup>T</sup>D<sup>T</sup>SL<sup>T</sup>-----  
HsFactorXII 308 PV<sup>R</sup>Y<sup>G</sup>Q<sup>C</sup>W<sup>V</sup>F<sup>A</sup>GV<sup>F</sup>NT<sup>F</sup>L<sup>R</sup>CL<sup>G</sup>IP<sup>A</sup>R<sup>V</sup>T<sup>N</sup>Y<sup>F</sup>NS<sup>A</sup>HD<sup>N</sup>D<sup>A</sup>N<sup>L</sup>Q-----

```

CaEnol      225  EALDLIMDAIDKAGYKGVGIAMDVASSEFYKDGYLDLDFKNPESDPSKWLSSGFOLA---
AgTGase     358  --IDYFVDDSE--KTGAGMT--VDSLW--NYHVWSEVVMQKDLHNPT
MmTGase     313  --IEYFRNEFG--EL-ETNK--SEMIW--NFHCWVESWMTRPDLQ-PG
GgTGase     323  --IDRYLSEGT--ME-EERRS--TDMTW--NFHCWVECWMTRPDLA-PG
AmTGase     348  --VDYFVDAEG--KVMKEIN--RDSVW--NFHVWNEVVMKRDDIS-AE
HsTGase     413  --MDIYFDENM--KPLEHLN--HDSVW--NFHVWVND CWMKRPDLP-SG
HsFactorXII 350  --MDIFLEEDG--N VNSKLT--KDSVW--NYHCWNEAWMTRPDLP-VG

CaEnol      282  -----DLYEQLISE-----YPIVSIEDPFAEDDWDWAVVHFFERVGDKIQIVG-DDL
AgTGase     398  YDGWQAVDATPQVLSDGMFKCGPCPVSAIKQGHVHPYDGEFIYAEVNADVLYWSIGNDO
MmTGase     351  YEGWQALDPTPOEKSEGTGCCPVSVRAIKEGDLSTKYDAPFVFAEVNADVVDWIRODE-
GgTGase     361  YDGWQALDPTPOEKSEGVYCCGPAFVKAIKEGDLQVQYDIPFVFAEVNADVYVWIVQSD-
AmTGase     387  YSGWQALDPTPOELSENAYRCGPASVIGVKRGDVLRFYDINAFVFAEVNADIVFWRNGPT
HsTGase     452  FDGWQVVDATPQETSGLFCCGPGSVESIKKGLVVMKYDTFFLFAEVNSDKVYVQRQDD-
HsFactorXII 389  FGGWQAVDSTPQENSDDGMYRCGPASVQAIKHGHVCFQFDAPFVFAEVNSDLIYITAKKD-

CaEnol      327  TVTNPTRIKTAIEKKAANALLKLVNOIGTLTESIQAA-----NDSVAAGWGVMSVSHRS
AgTGase     458  NPPKPL-----EISTAQVGNISTKAVGSGKREDVTERYKY-----PEDS
MmTGase     410  GSVLKW-----MNRSLIVGQKISTKSVGRDDREDITHYKY-----PEGS
GgTGase     420  GEKKKS-----THSSVVGKNISTKSVGRDSREDITHYKY-----PEGS
AmTGase     447  QPKLI-----QKDAYGIGOLISTKAVGKWTREDITHYKY-----PEKS
HsTGase     511  GSFKIV-----YVEEKAIIGTLIVTKATSSNMREDITYLYKH-----PEGS
HsFactorXII 448  GTHVVE-----NVDATHIGKLIIVTKQIGDGMMDITDTYKF-----QEGQ

CaEnol      380  GETEDTFIADLSVGLRSGOIKTGAPAR----SERLAKLNOILRIEELGSEAIYAGKDF
AgTGase     498  KEERDVMTAMKYSSQR-FSAGLAKRLLGAMVNDSSNGTEDAIOLEIKC-DEELTLGTTTF
MmTGase     450  PEEREVFTKANHLNKL-----AEKEETGVAMRIRV-GQ-YEHGNDF
GgTGase     459  EKEREVFSKAEHEKSS-----LGEQEEGLHMRIKL-SEGANNGSDF
AmTGase     487  YEERATMLKALROSQSL-FSRY-----LNDEFNDVTFDFEL-RDDIVIGQPF
HsTGase     551  DAERKAVETAAAHGSKPNVYA-----NRGSAEDVAMQVEA-Q-DAVMGODL
HsFactorXII 488  EEERLALLETALMYGAKKPLNTEG-----VMKRSRSNVDMDFEV-E-NAVLGKDF

CaEnol      435  QKASQL-----
AgTGase     556  QIEVVVTCASAVSSVEVTGRVLRDSDYTGRDMATLKVTP-FAIKLEPRESKSIIVPLEY
MmTGase     489  DVFAHIGNDT-SETRECRLLCARTVSYNGVLGPECGTED-INLTLDPYSENSIPLRILY
GgTGase     499  DVFAFISNDT-DKERECLRLCARTASYNGEVGPQCCKFDLLNLSLOPHMEQSVPLRILY
AmTGase     533  SVVLSIRNRSRNEYEVSVILRVETVLYTGRVGDVVKRWS-VNRVVMPTVEEARMVSW
HsTGase     595  MVSVMILNHS-SSRRTVKLHLYLSVTFYTGVSQTFKFKETK-KEVELAPGASDRVTMPVAV
HsFactorXII 534  KLSITFRNNS-HNRYTITAYLSANITFYTGVPKAEFKKET-FDVLTLEPLSFKKEAVLIQA

CaEnol      -----
AgTGase     615  GEYKTMTHHTNLRRAICTAEVYRGSDRTYFKLKNFHLVSPAIELSVEHSTSG-PIAVQVD
MmTGase     547  EKYSDCLETESNLIKVRGLLEPAANSYLLAERDLYVENPEIKIRVLGEPKQNRKLVAEVS
GgTGase     558  EOYGPNTLQDNMIKVVALLTEYETGDSVVAIRDVYIQNPEIKIRILGEPQERKLVAEIR
AmTGase     592  QEYGPRLDQCAFNVACLATVRDNTFEYFAODDFRVRKPDIAIRLENEAVVGDELKATAR
HsTGase     653  KEYRPHLVDQAGAMLLNVSGHVKESGOVLAKOHTFRLRTPDLSLTLGAAVVGQECEVQIV
HsFactorXII 592  GEYMGOLLEQASLHFFVTARINETRDLVLAQKSTVLTIPETIIKVRGTQVVGSDMTVTVE

CaEnol      -----
AgTGase     674  LSNPLPVPLTGGRFVVEGSRVTD-PMEKKYESI-PAGETVQFIYPINLSHKGKMVVVTASF
MmTGase     607  LKNPLSDPLDYDCIFTVEGAGLTKKEQKSVEVSDPVPAQDLVKARVDLSFTDIDGLHKLVVNF
GgTGase     618  LVNPLAEP LNNCIFVVEGAGLTEGORIEELEDVPEPQAEAKRMEFVPRQAGLHKLVMVDF
AmTGase     652  FQNPPLPIPLNKRGRFLIEGPGLE-QLKVKLPDPVRTGAYAECSFSMVPVRYEGRATIAAKF
HsTGase     713  FKNPLPVTLTNVVFRLGSGLQR-PKILNVGDI-CGNETVTLTROSFPVPRGPROLIASL
HsFactorXII 652  FTNPLKETLRNVVHLDGPGVWR-PMKKMFREI-RPNSTVQWEEVCRP VWSGHRKLIASL

CaEnol      -----
AgTGase     732  VSKELKNVHGDLTIDIP-----
MmTGase     667  QCDKLSVYKGYRNVIIGPA-----
GgTGase     678  ESDKLTGVRGYRNVIIAPLPK-----
AmTGase     711  YSNELEDVDGDFVNFVMVKNRGD-----
HsTGase     771  DSPQLSVEVGVIOVDVAPAPDGGFFSDAGGDSHLGETIPMASRGGG
HsFactorXII 710  SSDSLRHYVYGEILDVQIQRRPMSM-----

```

**Figure S13.** Clustal Omega alignment of *C. albicans* enolase 1 with TGases from *Anopheles gambiae* (Ag), *Mus musculus* (Mm), *Gallus gallus* (Gg), *Apis mellifera* (Am) and *Homo sapiens* (Hs).
