# Supplementary material for: The Candida albicans ENO1 gene encodes a transglutaminase involved in growth, cell division, morphogenesis, and osmotic protection
Source: PubMed Central journal article supplement (PMC5868267; doi:10.1074/jbc.m117.810440), 2018-01-31
Supplement: 10.1074_M117.810440_jbc.M117.810440-13.pdf [file 10.1074_M117.810440_jbc.M117.810440-13.pdf]

| TGase<br>(units) | Putrescine | Putrescine<br>plus cystamine | Lysine | Lysine plus cystamine |
|------------------|------------|------------------------------|--------|-----------------------|
|                  |            |                              |        |                       |
| 0.025            | 6,395      | 200                          | 4,074  | 156                   |
| 0.050            | 13,160     | 128                          | 7,615  | 174                   |

**Table S1.** Comparison between radioactive putrescine and lysine used as substrates for the determination of TGase activity from guinea pig liver. TGase activity was determined by measuring the amounts of radioactive precursors incorporated into N,N'-dimethyl casein precipitable by TCA. Results are the average of six determinations from three experiments.
